1  
2  
3  
4  
5  
6  
7  
8  
9  
10  
11  
12  
13  
14  
15  
16  
17  
18  
19  
20  
21

**Wastewater surveillance in smaller college communities may aid future public health initiatives**

Laura Lee<sup>1</sup>, Lescia Valmond<sup>2</sup>, John Thomas<sup>2</sup>, Audrey Kim<sup>2</sup>, Paul Austin<sup>1</sup>, Michael Foster<sup>1</sup>, John Matthews<sup>3</sup>, Paul Kim<sup>2</sup>, Jamie Newman<sup>1\*</sup>

<sup>1</sup>School of Biological Sciences, Louisiana State University, Ruston, Louisiana, United States of America

<sup>2</sup>Department of Biology, Grambling State University, Grambling, Louisiana, United States of America

<sup>3</sup>Trenchless Technology Center, Louisiana Tech University, Ruston, LA, United States of America

\* Corresponding author: Jamie Newman

E-mail: [jjnewman@latech.edu](mailto:jjnewman@latech.edu) (JN)

## 22 Abstract

23 Since its declaration, the COVID-19 pandemic has resulted in over 530 million cases and over 6 million  
24 deaths worldwide. Predominant clinical testing methods, though invaluable, may create an inaccurate  
25 depiction of COVID-19 prevalence due to inadequate access, testing, or most recently under-reporting  
26 because of at-home testing. These concerns have created a need for unbiased, community-level  
27 surveillance. Wastewater-based epidemiology has been used for previous public health threats, and more  
28 recently has been established as a complementary method of SARS-CoV-2 surveillance. Here we describe  
29 the application of wastewater surveillance for SARS-CoV-2 in two university campus communities  
30 located in rural Lincoln Parish, Louisiana. This cost-effective approach is especially well suited to rural  
31 areas where limited access to testing may worsen the spread of COVID-19 and quickly exhaust the  
32 capacity of local healthcare systems. Our work demonstrates that local universities can leverage scientific  
33 resources to advance public health equity in rural areas and enhance their community involvement.

34

## 35 Introduction

36 Since the COVID-19 pandemic was declared, there have been over 530 million infections and over 6  
37 million deaths worldwide [1]. Over the past two years, mutations during viral replication coupled with  
38 the unchecked global spread of COVID-19 have led to the emergence of more transmissible variants of  
39 concern. The first of these variants, the novel SARS-CoV-2 B.1.617.2 (Delta), was identified in India in  
40 December 2020 [2]. This variant was the catalyst for a COVID-19 surge seen in July 2020 [3]. Similarly,  
41 the novel SARS-CoV-2 B.1.1.529 (Omicron) variant emerged in November 2021 and resulted in yet  
42 another surge and a record number of cases across the United States [4].

43

44 Rapid diagnostic testing is a critical tool for breaking viral transmission chains and provides data on the  
45 prevalence and spread of infectious diseases that can inform public health decision making. However, in  
46 the case of COVID-19, each surge was exacerbated by limited supply and access to testing in the US,  
47 meaning that often the reports were underestimating the number of infected individuals. More at-home

48 testing and more mild or asymptomatic cases due to acquired immunity have further widened the  
49 discrepancy between caseload reporting and actual infections [5]. All of this then points to a need for  
50 additional community surveillance of SARS-CoV-2.

51  
52 Wastewater-based epidemiology (WBE), used for decades to monitor chemicals and pathogens through  
53 the analysis of sewage, has been propelled into the spotlight during the pandemic as a complementary tool  
54 for estimating COVID-19 prevalence in a community [6–8]. Compared to large-scale diagnostic testing  
55 programs, WBE avoids bias, is non-invasive, and is less constrained by limited testing capacity [9].  
56 Although the conversion of viral RNA copy number in sewage to infected individuals is complicated by  
57 biological and sewershed variability [10], WBE can still capture near-real-time longitudinal trends.  
58 Importantly, WBE has been shown to predict case surges by approximately 5-14 days, providing  
59 opportunities for public health and epidemiologic intervention [11,12].

60  
61 Rural areas that have fewer resources than urban areas have lagged in testing rates while also being home  
62 to a more vulnerable population [13,14]. In a low testing environment, a WBE approach is especially  
63 useful as it indicates infection levels and encourages allocation of resources to those communities to  
64 prevent or at least minimize the impact of an outbreak. Here we report on the analysis of longitudinal  
65 samples collected throughout the Delta and Omicron surges in rural Lincoln Parish, Louisiana. We assess  
66 the effect of fecal normalization and compare temporal trends of SARS-CoV-2 in the wastewater to  
67 confirmed cases to estimate the sensitivity of wastewater surveillance.

68  
69 **Methods:**

70 Wastewater from the city of Ruston was collected and analyzed at Louisiana Tech University (LTU) and  
71 wastewater from the city of Grambling and the Grambling State University campus was collected and  
72 analyzed at Grambling State University (GSU). The same protocol was followed by the two laboratories  
73 whenever possible with any differences described below.

74

75 *Wastewater Sample Collection*

76 City of Ruston wastewater:

77 Wastewater samples were collected from the single wastewater treatment facility in Ruston, Louisiana,  
78 the Ruston Water Treatment Plant. A total of 2.4 L of wastewater was collected with a refrigerated  
79 autosampler over 12 hours from 7:00 am to 7:00 pm on the day of sampling. From that, a 100 mL  
80 composite sample (2 50 mL tubes) was collected, and heat inactivated in a water bath at 60°C for 90  
81 minutes with one turn at 45 minutes. Following inactivation, these samples were stored at 4°C to be  
82 picked up that same week. Composite samples were collected from 5/26/2021 to 5/4/2022 and processed  
83 at Louisiana Tech University (LTU).

84

85 City of Grambling and GSU campus wastewater:

86 The lift stations most proximal to the City of Grambling Wastewater Treatment Plant that convey  
87 wastewater from the city sewershed (32.516403, -92.717004) and GSU campus sewershed (32.515078, -  
88 92.718722) were selected for weekly sampling. Composite samples (150 mL per hour for 24 hours) were  
89 collected on ice from Tuesday morning to Wednesday morning each week from 4/27/2021 to 5/3/2022  
90 and immediately processed at GSU.

91

92 *Wastewater Sample Processing*

93 City of Ruston wastewater:

94 The heat-inactivated wastewater samples were centrifuged at  $4696 \times g$  for 30 minutes to remove debris.  
95 The 2 50 mL samples were combined into one 20 mL aliquot of supernatant, and viral matter was  
96 precipitated using 10% polyethylene glycol (PEG) and 2.25% NaCl with gentle inversion until reagents  
97 dissolved based on the method described by Hebert [15]. This solution was stored at 4°C until  
98 centrifugation at  $12,000 \times g$  for 120 minutes at 4°C. The resulting pellet was resuspended in 140  $\mu$ L  
99 nuclease-free water and stored at  $-80^{\circ}\text{C}$  until RNA extraction could be completed.

100

101 City of Grambling and GSU campus wastewater:

102 Viruses were concentrated from 60 mL of clarified supernatant via PEG/NaCl precipitation as at LTU.

103 The wastewater/PEG/NaCl solution was centrifuged at  $12,000 \times g$  for 99 minutes at  $4^{\circ}\text{C}$ . The resulting

104 pellet was resuspended in 140  $\mu\text{L}$  of PBS for immediate extraction.

105

106 *Viral RNA Extraction*

107 City of Ruston wastewater:

108 Viral RNA was extracted from 140  $\mu\text{L}$  of resuspended samples using the QIAGEN QIAmp MiniKit

109 (#52904) according to the manufacturer's protocol. The extracted RNA was eluted from the column using

110 40  $\mu\text{L}$  elution buffer. The RNA purity and yield was determined using the BioTek Cytation Take5 plate

111 reader.

112

113 City of Grambling and GSU campus wastewater:

114 Viral RNA was extracted as at LTU with one modification. The addition of 5.6  $\mu\text{g}$  of carrier RNA to the

115 lysis buffer was omitted from the initial sample to allow for quality assessment of the extracted RNA.

116 RNA integrity measured using the Invitrogen Qubit RNA IQ Assay indicated 61% large or structured

117 RNA and 39% small RNA.

118

119 *RT-qPCR and Fecal Normalization*

120 City of Ruston wastewater:

121 10  $\mu\text{L}$  of viral RNA was used in a 20  $\mu\text{L}$  reaction to create cDNA using the Applied Biosystems High-

122 Capacity Reverse Transcription Kit with RNase Inhibitor (#4368814) according to the manufacturer's

123 protocol. The resulting cDNA was stored at  $-20^{\circ}\text{C}$  for up to a week prior to quantification of SARS-CoV-

124 2 RNA presence. SARS-CoV-2 presence was measured via qPCR detection using the IDT 2019-nCoV

125 RUO Kit (#10006713) containing the CDC 2019-nCoV diagnostic primer/probe mixes for the N1 and N2

126 gene targets (IDT #10006625) with the TaqMan Universal PCR Master Mix (Thermo Fisher #4304437)  
127 according to the manufacturer's protocol. Each reaction contained 10  $\mu$ L master mix, 1.5  $\mu$ L primer/probe  
128 mix for N1 or N2, 2  $\mu$ L target sample, and brought to a total volume of 20  $\mu$ L using nuclease-free water.  
129 Reactions were run at 95°C for 10 minutes, 50 cycles of 95°C for 15 seconds followed by 60°C for 1  
130 minute. For qPCR detection of PMMoV, a primer/probe mix previously described by Haramoto et al. was  
131 used instead of the N1 or N2 primer/probe mixes [16]. Amplification parameters were 25°C for 10  
132 minutes, 95°C for 3 minutes, 45 cycles of 95°C for 15 seconds followed by 60°C for 1 minute. All qPCR  
133 reactions were done in triplicate. The reactions were prepared in an Applied Biosystems MicroAmp Fast  
134 96 well reaction plate (#4346906) sealed with MicroAmp clear optical adhesive film (#4311971) and  
135 analyzed on an Applied Biosystems StepOnePlus RT-qPCR machine. N1 and N2 samples were quantified  
136 using a serial dilution for each gene target. IDT 2019-nCoV N positive control plasmid (#10006625) was  
137 used at concentrations ranging from  $4 \times 10^5$  to  $4 \times 10^1$  copies per reaction. PMMoV samples were  
138 quantified using a 68 bp DNA oligo containing the target region in a serial dilution ranging from  $2.4 \times 10^7$   
139 to  $2.4 \times 10^1$  copies per reaction [15]. For fecal normalization, the genome copies or GC/mL of N1 and N2  
140 were divided by the GC/mL of PMMoV to obtain a unitless ratio of SARS-CoV-2 to PMMoV [17].

141

142 City of Grambling and GSU campus wastewater:

143 Reverse transcription was performed as at LTU. The cDNA was stored at -20°C for 1 to 3 days prior to  
144 analysis for SARS-CoV-2 and 1 to 8 weeks prior to analysis for PMMoV. SARS-CoV-2 and PMMoV  
145 were quantified as at LTU using the IDT 2019-nCoV RUO kit but with the IDT PrimeTime Gene  
146 Expression Master Mix (#1055772) according to the manufacturers' protocols. All qPCR reactions were  
147 assembled in triplicate. Samples were prepared in a Bio-Rad HSP9601 clear well plate sealed with a Bio-  
148 Rad MSB1001 adhesive optical film and analyzed on a Bio-Rad CFX Connect instrument. Quantification  
149 cycle (Cq) was determined using Bio-Rad CFX Manager 3.1. N1 and N2 in the samples were quantified  
150 using serial dilutions of two standards: (1) the IDT 2019-nCoV\_N positive control plasmid containing the  
151 complete nucleocapsid gene at concentrations ranging from  $2 \times 10^4$  to  $2 \times 10^1$  plasmid copies per reaction

152 and (2) the ATCC VR3276SD synthetic RNA, reverse transcribed following the same protocol as sample  
153 RNA, at concentrations ranging from  $2 \times 10^4$  to  $2 \times 10^1$  RNA copies input to reverse transcription  
154 (Supplemental Figure 1). PMMoV quantification and normalization was performed as described at LTU.

155

## 156 **Results**

157 Ruston, a city in rural Lincoln Parish, Louisiana with a population of approximately 22,000 people, is  
158 home to Louisiana Tech University, a public university with an enrollment of approximately 12,000  
159 students. The city of Ruston has a single wastewater treatment facility that services wastewater for over  
160 90% of the population. To carry out wastewater surveillance of SARS-CoV-2, we collaborated with the  
161 city's wastewater treatment facility to obtain samples for analysis. Samples were not able to be collected  
162 every week due to inclement weather, critical mechanical difficulties at the treatment facility, or absence  
163 of staff (Supplemental Table 1). The city of Grambling, also in Lincoln Parish, has a population of 5,150  
164 residents as of the July 8, 2021, census. Grambling State University (GSU) has an enrollment of 5,438  
165 students with 2,005 students living on campus and 226 faculty and 367 staff members working on campus  
166 during the Fall 2021 academic term, and 1,818 students, 197 faculty, and 374 staff members on campus  
167 during the Spring 2022 academic term.

168

169 We determined the concentration (genome copies or GC/L) of pepper mild mottle virus (PMMoV), a  
170 fecal indicator that is frequently used to normalize wastewater testing and account for fluctuations in  
171 population or precipitation during the collection period (Fig 1). PMMoV is highly abundant in raw  
172 wastewater with concentrations ranging from  $10^5$  to  $10^9$  GC/L typically being reported in the literature  
173 [18]. We detected PMMoV in all samples from all sites with average concentrations in the order of  $10^8$   
174 GC/L in Ruston and  $10^6$  GC/L in the smaller Grambling community. In Grambling, the PMMoV  
175 concentrations in the city mirrored the GSU campus, which in turn were highly dependent on the  
176 academic calendar with a high of  $2.7 \times 10^7$  GC/L detected during Homecoming week and a low of  $2.4 \times$   
177  $10^3$  GC/L detected during the Thanksgiving Break. PMMoV concentrations in Ruston were not as

178 coupled to the LTU academic calendar and various events in the community that brought people to  
179 Ruston, LA may account for spikes in the wastewater signal.

180

181 ***Fig 1. Pepper mild mottle virus (PMMoV) in wastewater.*** *PMMoV concentrations expressed as genome*  
182 *copies or GC/L in the wastewater of Ruston (A), Grambling (B), and Grambling State University (C). The*  
183 *timeline is annotated with key events and dates including dates when no wastewater samples were*  
184 *collected or PMMoV amplification failed. For full table of reporting in Ruston see Supplemental Table*  
185 *S1.*

186

187 The non-normalized wastewater concentrations of SARS-CoV-2 in Ruston, Grambling, and GSU are  
188 expressed as GC/L in Fig 2. In Ruston, N1 or N2 genes were detected in 45 of 46 wastewater samples  
189 with values ranging from  $1 \times 10^3$  GC/L to  $1.1 \times 10^6$  GC/L. In January and February 2022, the  
190 concentrations of SARS-CoV-2 detected were unexpectedly low considering this was during the peak of  
191 the Omicron surge in Louisiana. In Grambling, N1 or N2 was only detected in 19 of 51 wastewater  
192 samples and at much lower concentrations than in Ruston, often only exceeding the limit of detection  
193 when viral loads were relatively high in the GSU campus sewershed. On the GSU campus, we observed  
194 two spikes in the wastewater signal associated with the Delta and Omicron surges against a low baseline  
195 signal in 29 of 51 wastewater samples.

196

197 ***Fig 2. SARS-CoV-2 in wastewater.*** *N1 and N2 concentrations expressed as genome copies or GC/L in*  
198 *the wastewater of Ruston (A), Grambling (B), and Grambling State University (C).*

199

200 The PMMoV-normalized wastewater concentrations of SARS-CoV-2 expressed as unitless ratios are  
201 presented with city caseload data (Fig 3). Normalizing for fecal load reveals that SARS-CoV-2  
202 concentrations in Ruston wastewater during the Omicron surge were comparable to those detected during  
203 the Delta surge. The low GC/L observed in the non-normalized data may have been due to viral losses in



204 the sewage system. In the Grambling community, there was little correlation between normalized SARS-  
205 CoV-2 concentration in city wastewater and confirmed infections in the city as both appear to be  
206 primarily driven by the influx and efflux of people on the GSU campus. Because SARS-CoV-2 can be  
207 shed in feces early in the course of COVID-19 infection, it has been proposed that wastewater  
208 surveillance can serve as an early warning system [19–21]. On the GSU campus however, the wastewater  
209 signal appeared to lag or at best coincide with the increase in confirmed infections during the Delta surge.  
210 The sudden influx of thousands of students at the beginning of the academic year, all of whom were  
211 screened if moving into campus housing, precludes using wastewater surveillance as a forecasting tool in  
212 this instance. There was no data collected from the campus sewershed during Winter Break, but it is  
213 reasonable to expect a similar lack of predictive power during the initial Omicron surge which coincided  
214 with the return of students to campus. Other limitations of our study include the lack of a matrix control  
215 to assess viral recovery and the lack of normalization for daily wastewater flow.

216  
217 ***Fig 3. PMMoV-normalized SARS-CoV-2 in wastewater and weekly caseloads. N1 and N2***  
218 *concentrations in the wastewater of Ruston (A), Grambling (B), and Grambling State University (C) were*  
219 *divided by PMMoV concentrations to obtain a unitless ratio that normalizes for fecal load. All ratios are*  
220 *relative to the lowest ratio set arbitrarily as  $10^0$  and plotted on the left Y axis. Total weekly caseloads in*  
221 *zip codes 71270 and 71273 (Ruston) and zip code 71245 (Grambling/Grambling State University) are*  
222 *plotted on the right Y axis.*

223

## 224 **Conclusion**

225 Here we demonstrate the ability of smaller universities to serve as public health resources in their  
226 community by engaging undergraduate students in wastewater surveillance. Monitoring of wastewater  
227 for SARS-CoV-2 is especially critical as we enter a time of at-home testing and generally less official  
228 reporting. This is a trend confirmed by data from The Institute for Health Metrics and Evaluation, our  
229 analysis of which suggests that during the peak of the Delta surge, approximately 41% of cases are

230 estimated to have been reported, compared to roughly 21% during the peak of the Omicron surge, and  
231 less than 10% toward the end of this study period [22]. Ruston, Grambling, and GSU all saw an increase  
232 in viral wastewater concentrations in January and February 2022, corresponding to increased regional and  
233 national caseloads. However, in looking at the data (Fig 3), the same relative genome copies  
234 corresponded to higher local caseloads in earlier months than what was being reported in April and May  
235 2022, suggesting more recent under-reporting of COVID-19 cases in communities. This is a significant  
236 problem because under-reporting may lead to a false sense of security among the public and hinder data-  
237 driven decisions by policymakers. Overall, this study indicates the need to continue regular surveillance  
238 and heed the warnings of viral genome concentrations in the wastewater as a representative indicator of  
239 community health. Smaller communities do not always have access to the same resources or information  
240 available in larger cities. In these cases, it is critical that the university community become engaged in  
241 monitoring and supporting public health initiatives. The ability for two campuses to initiate this type of  
242 surveillance and train undergraduate students to be a part of the research programs establishes a model for  
243 this type of work going forward that will allow universities to participate in public health.

244

#### 245 **Acknowledgements**

246 We would like to thank Helaina Desentz, Louisiana Department of Health, Region 8 Epidemiologist for  
247 providing local caseload data and Casey Jackson for wastewater sampling through the duration of this  
248 project.

249

250

251

252

253

254 1. WHO Coronavirus (COVID-19) Dashboard [Internet]. [cited 2022 Jun 2]. Available from:

255 <https://covid19.who.int>

- 256 2. Lou F, Li M, Pang Z, Jiang L, Guan L, Tian L, et al. Understanding the Secret of SARS-CoV-2  
257 Variants of Concern/Interest and Immune Escape. *Frontiers in Immunology* [Internet]. 2021  
258 [cited 2022 May 28];12. Available from:  
259 <https://www.frontiersin.org/article/10.3389/fimmu.2021.744242>
- 260 3. Mlcochova P, Kemp SA, Dhar MS, Papa G, Meng B, Ferreira IATM, et al. SARS-CoV-2 B.1.617.2  
261 Delta variant replication and immune evasion. *Nature*. 2021 Nov;599(7883):114–9.
- 262 4. Molecular basis of immune evasion by the Delta and Kappa SARS-CoV-2 variants [Internet]. [cited  
263 2022 May 28]. Available from: <https://www.science.org/doi/10.1126/science.abl8506>
- 264 5. Jetelina K. State of Affairs: Can we trust case numbers? [Internet]. *Your Local Epidemiologist*. 2022  
265 [cited 2022 Jun 2]. Available from: [https://yourlocalepidemiologist.substack.com/p/state-of-](https://yourlocalepidemiologist.substack.com/p/state-of-affairs-can-we-trust-case)  
266 [affairs-can-we-trust-case](https://yourlocalepidemiologist.substack.com/p/state-of-affairs-can-we-trust-case)
- 267 6. Ahmed W, Angel N, Edson J, Bibby K, Bivins A, O'Brien JW, et al. First confirmed detection of  
268 SARS-CoV-2 in untreated wastewater in Australia: A proof of concept for the wastewater  
269 surveillance of COVID-19 in the community. *Science of The Total Environment*. 2020 Aug  
270 1;728:138764.
- 271 7. Medema G, Heijnen L, Elsinga G, Italiaander R, Brouwer A. Presence of SARS-Coronavirus-2 RNA in  
272 Sewage and Correlation with Reported COVID-19 Prevalence in the Early Stage of the Epidemic  
273 in The Netherlands. *Environ Sci Technol Lett*. 2020 May 20;acs.estlett.0c00357.
- 274 8. Wurtzer S, Waldman P, Levert M, Cluzel N, Almayrac JL, Charpentier C, et al. SARS-CoV-2 genome  
275 quantification in wastewaters at regional and city scale allows precise monitoring of the whole  
276 outbreaks dynamics and variants spreading in the population. *Sci Total Environ*. 2022 Mar  
277 1;810:152213.
- 278 9. Larsen DA, Wigginton KR. Tracking COVID-19 with wastewater. *Nat Biotechnol*. 2020  
279 Oct;38(10):1151–3.
- 280 10. Li X, Zhang S, Shi J, Luby SP, Jiang G. Uncertainties in estimating SARS-CoV-2 prevalence by  
281 wastewater-based epidemiology. *Chemical Engineering Journal*. 2021 Jul 1;415:129039.

- 282 11. Agrawal S, Orschler L, Lackner S. Long-term monitoring of SARS-CoV-2 RNA in wastewater of the  
283 Frankfurt metropolitan area in Southern Germany. *Sci Rep*. 2021 Dec;11(1):5372.
- 284 12. Nemudryi A, Nemudraia A, Wiegand T, Surya K, Buyukyoruk M, Cicha C, et al. Temporal Detection  
285 and Phylogenetic Assessment of SARS-CoV-2 in Municipal Wastewater. *CR Med [Internet]*.  
286 2020 Sep 22 [cited 2022 Jan 6];1(6). Available from: [https://www.cell.com/cell-reports-](https://www.cell.com/cell-reports-medicine/abstract/S2666-3791(20)30124-5)  
287 [medicine/abstract/S2666-3791\(20\)30124-5](https://www.cell.com/cell-reports-medicine/abstract/S2666-3791(20)30124-5)
- 288 13. Cuadros DF, Branscum AJ, Mukandavire Z, Miller FD, MacKinnon N. Dynamics of the COVID-19  
289 epidemic in urban and rural areas in the United States. *Annals of Epidemiology*. 2021 Jul  
290 1;59:16–20.
- 291 14. Souch JM, Cossman JS. A Commentary on Rural-Urban Disparities in COVID-19 Testing Rates per  
292 100,000 and Risk Factors. *J Rural Health*. 2021 Jan;37(1):188–90.
- 293 15. T.T. Hebert. Precipitation of plant viruses by polyethylene glycol. 1963;53:362.
- 294 16. Haramoto E, Kitajima M, Kishida N, Konno Y, Katayama H, Asami M, et al. Occurrence of Pepper  
295 Mild Mottle Virus in Drinking Water Sources in Japan. *Appl Environ Microbiol*. 2013  
296 Dec;79(23):7413–8.
- 297 17. CDC. National Wastewater Surveillance System [Internet]. Centers for Disease Control and  
298 Prevention. 2022 [cited 2022 Jun 6]. Available from:  
299 [https://www.cdc.gov/healthywater/surveillance/wastewater-surveillance/data-reporting-](https://www.cdc.gov/healthywater/surveillance/wastewater-surveillance/data-reporting-analytics.html)  
300 [analytics.html](https://www.cdc.gov/healthywater/surveillance/wastewater-surveillance/data-reporting-analytics.html)
- 301 18. Kitajima M, Sassi HP, Torrey JR. Pepper mild mottle virus as a water quality indicator. *npj Clean*  
302 *Water*. 2018 Oct 15;1(1):1–9.
- 303 19. Peccia J, Zulli A, Brackney DE, Grubaugh ND, Kaplan EH, Casanovas-Massana A, et al.  
304 Measurement of SARS-CoV-2 RNA in wastewater tracks community infection dynamics. *Nat*  
305 *Biotechnol*. 2020 Oct;38(10):1164–7.

- 306 20. Randazzo W, Truchado P, Cuevas-Ferrando E, Simón P, Allende A, Sánchez G. SARS-CoV-2 RNA  
307 in wastewater anticipated COVID-19 occurrence in a low prevalence area. *Water Research*. 2020  
308 Aug 15;181:115942.
- 309 21. Wu F, Xiao A, Zhang J, Moniz K, Endo N, Armas F, et al. SARS-CoV-2 RNA concentrations in  
310 wastewater foreshadow dynamics and clinical presentation of new COVID-19 cases. *Sci Total*  
311 *Environ*. 2022 Jan 20;805:150121.
- 312 22. IHME | COVID-19 Projections [Internet]. Institute for Health Metrics and Evaluation. [cited 2022 Jun  
313 2]. Available from: <https://covid19.healthdata.org/>
- 314 23. Bivins A, Kaya D, Bibby K, Simpson SL, Bustin SA, Shanks OC, et al. Variability in RT-qPCR assay  
315 parameters indicates unreliable SARS-CoV-2 RNA quantification for wastewater surveillance.  
316 *Water Research*. 2021 Sep 15;203:117516.

317  
318  
319  
320  
321  
322  
323  
324  
325  
326  
327  
328  
329  
330  
331

**A.**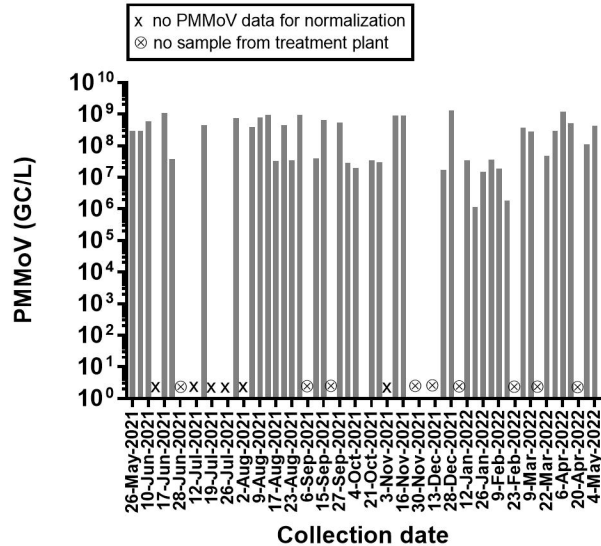**B.**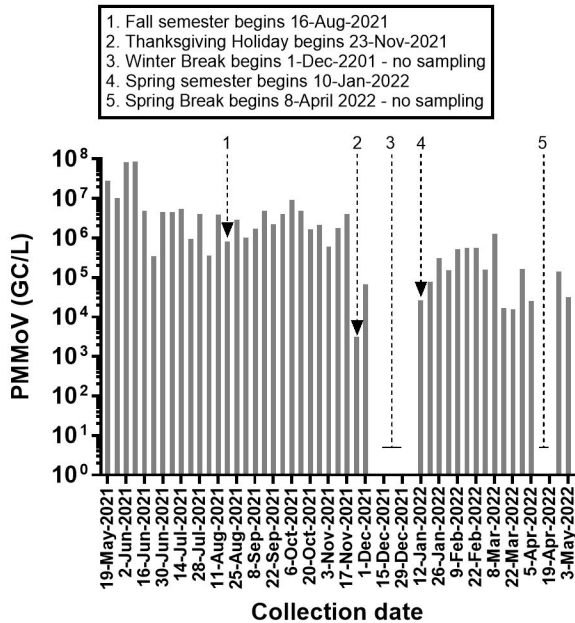**C.**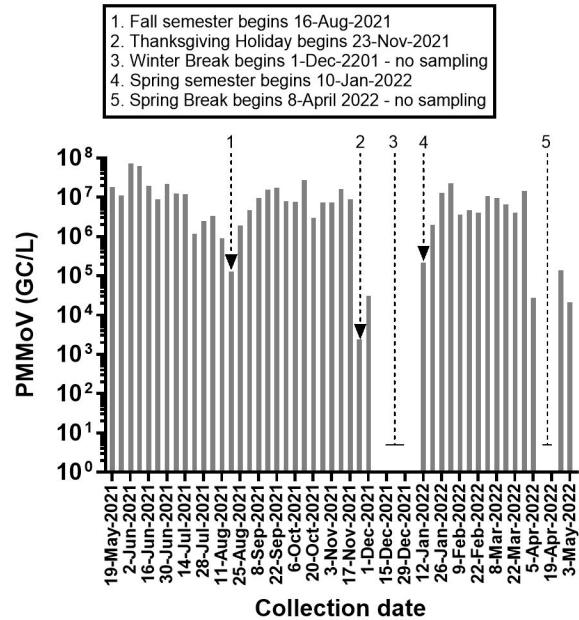

**A.**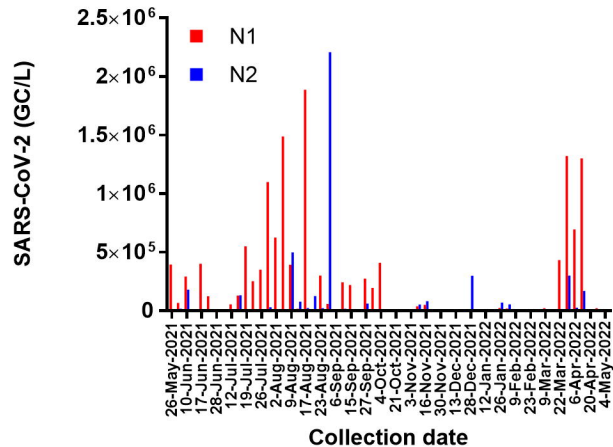**B.**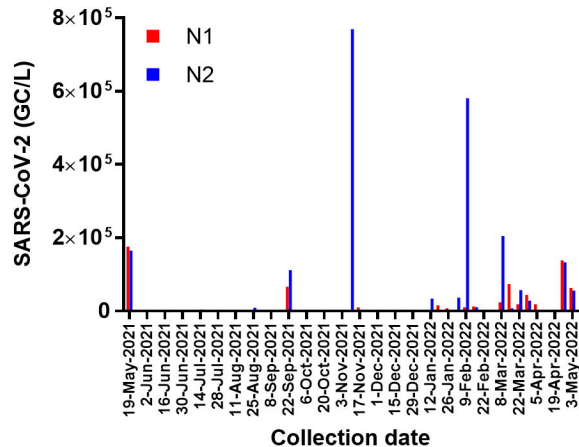**C.**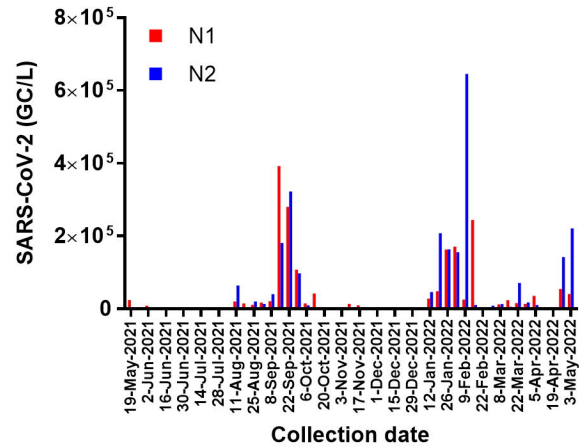

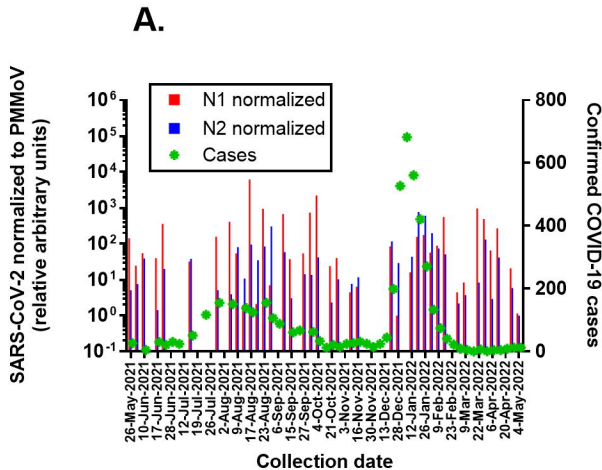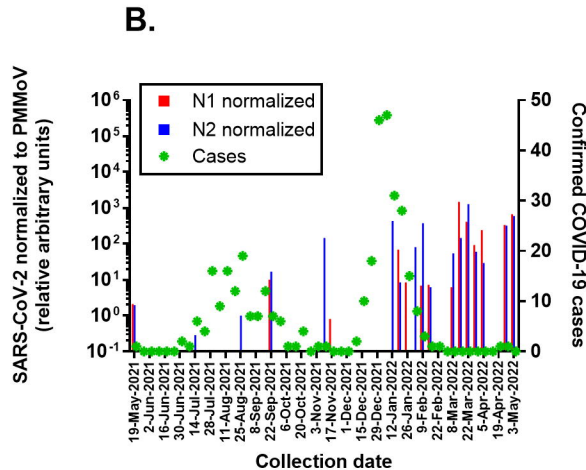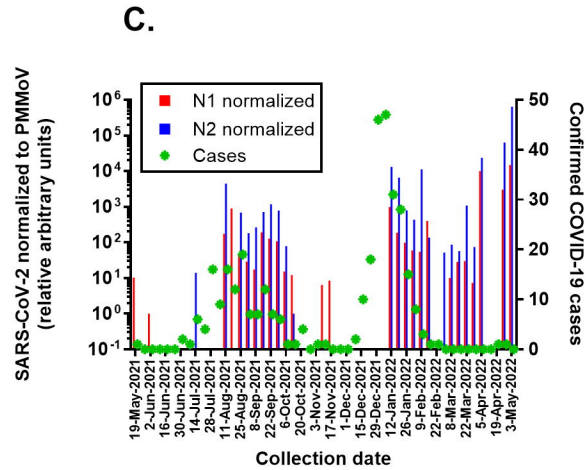

Source: https://medrxiv.org/content/10.1101/2022.06.13.22276267v1.full.pdf
